# Supplementary material
Source: HighWire-hosted journal article supplement (https://qualitysafety.bmj.com/highwire/filestream/147446/field_highwire_adjunct_files/0/bmjqs-2012-001615supp.pdf)
Supplement: bmjqs-2012-001615supp.pdf [file bmjqs-2012-001615supp.pdf]

## Graber

### Appendix – The Incidence of Diagnostic Error in Medicine

**Table 1: Diagnostic Error Rates in Specific Conditions**

|                                         |                                 |                                                                                                                                                                                                                                                         |
|-----------------------------------------|---------------------------------|---------------------------------------------------------------------------------------------------------------------------------------------------------------------------------------------------------------------------------------------------------|
| <i>Mikulin and Hardcastle (1987)(1)</i> | <b>Gastric cancer</b>           | Of 83 patients with gastric cancer, the median delay in diagnosis was 7 weeks                                                                                                                                                                           |
| <i>Lee et al (1987)(2)</i>              | <b>Myocardial infarction</b>    | In a prospective multicenter study of 3077 patients seen in the ER with chest pain, 477 had acute MI's, and of these 18 (4%) had been discharged from the ER without making the diagnosis                                                               |
| <i>Jones et al (1990)(3)</i>            | <b>Asthma</b>                   | Of 187 children with asthma, diagnosis delayed in many and the length of delay was longer in older children                                                                                                                                             |
| <i>Charlton et al (1991)(4)</i>         | <b>Asthma</b>                   | <i>Of 212 children with asthma, the median delay in making the correct diagnosis was 3 years (or 7 office visits)</i>                                                                                                                                   |
| <i>Schnettler (1992)(5)</i>             | <b>Oral Cancer</b>              | <i>Of 96 cases seen in 3 oral surgery departments, the referring general practitioner had made the correct diagnosis in only 52%.</i>                                                                                                                   |
| <i>Sorensen et al (1992)(6)</i>         | <b>Meningitis</b>               | <i>Of 177 patients with meningococcal meningitis, the diagnosis was delayed in 52%</i>                                                                                                                                                                  |
| <i>McCarthy et al (1993)(7)</i>         | <b>Myocardial infarction</b>    | <i>In a multicenter study of 5773 patients seen in the ER with suspicious chest pain, the diagnosis of MI was made correctly in 1030 and missed in 20 (1.9%)</i>                                                                                        |
| <i>Lederle et al (1994)(8)</i>          | <b>Ruptured aortic aneurysm</b> | Review of all cases at a single medical center over a 7 yr period. Of 23 abdominal aortic dissections, the diagnosis was initially missed in 14 (61%)                                                                                                   |
| <i>Bleeker et al (1995)(9)</i>          | <b>Myocardial infarction</b>    | Of 300 patients admitted with myocardial infarction, the median delay from symptoms to admission was 84 minutes                                                                                                                                         |
| <i>Paauw et al (1995)(10)</i>           | <b>HIV complications</b>        | Patients with classical complications were sent to 134 primary care physicians: Kaposi's sarcoma was noticed by 47% and misdiagnosed by 45%; Oral hairy leukoplakia was noticed by 56% and misdiagnosed by 59%; Lymphadenopathy was noticed by only 17% |
| <i>Beam et al (1996)(11)</i>            | <b>Breast cancer</b>            | 50 accredited centers reviewed blinded mammograms of 79 women, 45 of whom had breast cancer. The diagnosis would have been missed in 21%                                                                                                                |
| <i>Burton et al (1998)(12)</i>          | <b>Cancer detection</b>         | Autopsy study at a single hospital: Of 250 malignancies, 111 were either missed or misdiagnosed, and in 57 cases the cause of death was cancer-related                                                                                                  |
| <i>Burgess et al (1998)(13)</i>         | <b>Breast cancer</b>            | Of 132 patients with breast cancer, referral for definitive management was delayed in 32 (17%)                                                                                                                                                          |
| <i>Bouma et al (1999)(14)</i>           | <b>Myocardial infarction</b>    | Of 400 patients admitted with myocardial infarction, the diagnosis was delayed in female compared to male patients                                                                                                                                      |
| <i>Meera et al (1999)(15)</i>           | <b>Parkinson's disease</b>      | Of 402 cases with presumed Parkinson's disease and on medications, only 53% had the disease on definitive evaluation                                                                                                                                    |
| <i>Goddard et al (1999)(16)</i>         | <b>Retinoblastoma</b>           | Of 100 children with retinoblastoma, the diagnosis was delayed in 23%                                                                                                                                                                                   |
| <i>Van Schayak et al (2000)(17)</i>     | <b>Asthma</b>                   | Of 1155 randomly-screened patients, spirometry suggested asthma in 86. Only 29 of these had ever complained of relevant symptoms to their physician, and of the diagnosis was missed in 6 (21%)                                                         |
| <i>Pope et al (2000)(18)</i>            | <b>Myocardial infarction</b>    | Of 10,689 patients seen for suspicious chest pain in 10 different ER's, 889 had acute myocardial infarction, of which 22 (2.3%) were mistakenly discharged from the ER                                                                                  |
| <i>Graff et al (2000)(19)</i>           | <b>Appendicitis</b>             | Retrospective study at 12 hospitals. Of 1,026 patients who had surgery for suspected appendicitis. 110 patients had no appendicitis at surgery; Of 916 patients with a diagnosis of appendicitis, the diagnosis was missed or wrong in 170 (18.6%)      |
| <i>von Kodolitsch</i>                   | <b>Ruptured aortic</b>          | In patients presenting with chest pain due to dissections of the proximal                                                                                                                                                                               |

|                            |                                               |                                                                                                                                                                                                                                        |
|----------------------------|-----------------------------------------------|----------------------------------------------------------------------------------------------------------------------------------------------------------------------------------------------------------------------------------------|
| et al (2000)(20)           | <b>aneurysm</b>                               | aorta, the diagnosis was missed in 35%                                                                                                                                                                                                 |
| Kantola et al (2001)(21)   | <b>Tongue cancer</b>                          | Of 75 cases, referral to specialty care was delayed in 35%                                                                                                                                                                             |
| Pidenda et al (2001)(22)   | <b>Pulmonary embolism</b>                     | Review of fatal pulmonary embolism over a 5 year period at a single institution. Of 67 patients who died of pulmonary embolism, the diagnosis was not suspected clinically in 37 (55%)                                                 |
| Levack et al (2002)(23)    | <b>Cancer-related spinal cord compression</b> | Of 319 patients, the median delay in diagnosis was 18 days                                                                                                                                                                             |
| Edelman (2002)(24)         | <b>Diabetes mellitus</b>                      | Retrospective review of 1,426 patients with laboratory evidence of diabetes mellitus (glucose > 200 mg/dl or HgbA1c > 7%): There was no mention of diabetes in the clinical record in 18% of these patients                            |
| Shojania (2002)(25)        | <b>Pulmonary tuberculosis</b>                 | Review of autopsy studies that specifically focused on pulmonary TB: Approximately half of these diagnoses were not suspected antemortem                                                                                               |
| McGinnis et al (2002)(26)  | <b>Melanoma</b>                               | Second review of 5,146 biopsies: The diagnosis changed in 11% (1.1% benign to malignant; 1.2% malignant to benign; 8% change in tumor grade)                                                                                           |
| Gorter et al (2002)(27)    | <b>Psoriatic arthritis</b>                    | Patients with classical psoriatic arthritis visited 23 rheumatologists: The diagnosis was missed or wrong in 9 visits (39%)                                                                                                            |
| Lopponen et al (2003)(28)  | <b>Dementia</b>                               | All 1260 patients in a small town were screened for dementia. 9% screened positive, but only 4% had been previously diagnosed                                                                                                          |
| Goyal et al (2004)(29)     | <b>Bone cancer</b>                            | Of 103 patients with osteosarcoma or Ewing's sarcoma at two hospitals, delayed diagnosis was associated with being seen by a general practitioner (vs ER physician) and in patients under 12 years of age                              |
| Jiwa et al (2004)(30)      | <b>Cancer</b>                                 | Of 56 patients with cancer, significant delays in diagnosis were encountered in 8 cases                                                                                                                                                |
| Vasudev et al (2004)(31)   | <b>Testicular cancer</b>                      | Of 180 men with testicular cancer, referral to specialty care was delayed in 60%                                                                                                                                                       |
| Kowalski et al (2004)(32)  | <b>Subarachnoid hemorrhage</b>                | Of 482 patients with subarachnoid hemorrhage at a single hospital, the diagnosis was initially wrong in 56 (12%) and 22 of these patients suffered neurological complications before the diagnosis was confirmed                       |
| Yates et al (2004)(33)     | <b>Iron deficiency anemia</b>                 | Of 431 patients with microcytic anemia, 57% had no GI investigations, and of 53 patients who ultimately died of GI cancer, 41 had had no investigation. Female sex, age < 65, and Hgb > 9 gm/dl were associated with non-investigation |
| Bogun et al (2004)(34)     | <b>Atrial fibrillation</b>                    | Review of automated ECG interpretations: 35% of readings interpreted at atrial fibrillation were wrong and the error was detected by the reviewing cardiologist only 76% of the time                                                   |
| Buchewitz et al (2005)(35) | <b>Endometriosis</b>                          | Digital videotapes of laparoscopies were shown to 108 gynecologic surgeons: The interobserver agreement regarding the number of lesions was only 18%                                                                                   |
| Raab et al (2005)(36)      | <b>Cancer pathology</b>                       | Reviewed pathology material from 4 hospitals over 1 year: The error rate was 2-9% for gynecologic cancer and 5-12% for non-gynecologic cancer                                                                                          |
| Perlis (2005)(37)          | <b>Bipolar disorder</b>                       | The initial diagnosis was wrong in 69% of patients and delays in reaching the correct diagnosis were common                                                                                                                            |
| Edlow (2005)(38)           | <b>Subarachnoid hemorrhage</b>                | Review of published studies: Approximately 30% are misdiagnosed at presentation                                                                                                                                                        |
| Arnon et al (2006)(39)     | <b>Infant botulism</b>                        | Of 129 infants with botulism over a 5 year period, only half the cases were suspected at the time of admission                                                                                                                         |
| Campos (2012)(40)          | <b>Alpha-1 Antitrypsin Deficiency</b>         | 200,000 patients in the US have severe deficiency; Less than 10% have been properly diagnosed                                                                                                                                          |
|                            |                                               |                                                                                                                                                                                                                                        |
|                            |                                               |                                                                                                                                                                                                                                        |
|                            |                                               |                                                                                                                                                                                                                                        |
|                            |                                               |                                                                                                                                                                                                                                        |

Adapted in part from Schiff et al, 2005 (41) and Kostopolou et al, 2008 (42). Note: This list is a convenience sample of published articles, not a comprehensive listing.

## REFERENCES

1. Mikulin T, Hardcastle J. Gastric cancer - delay in diagnosis and its causes. *Eur J Cancer Clin Oncol.* 1987;23:1683-90.
2. Lee T, Rouan G, Weisberg M, al e. Clinical characteristics and natural history of patients with acute myocardial infarction sent home from the Emergency Room. *Am J Cardiol.* 1987;60:219-24.
3. Jones A, Sykes A. The effect of symptom presentation on delay in asthma diagnosis in children in a general practice. *Respir Med.* 1990;84:139-42.
4. Charlton I, Jones K, Bain J. Delay in diagnosis of childhood asthma and its influence on respiratory consultation rates. *Arch Dis Child.* 1991;66:633-5.
5. Schnetler J. Oral cancer diagnosis and delays in referral. *Br J Oral Maxillofac Surg.* 1992;30:210-3.
6. Sorensen H, Moller-Peterson J, Krarup H, al e. Diagnostic problems with meningococcal disease in general practice. *J Clin Epidemiol.* 1992;45:1289-93.
7. McCarthy B, Beshansky J, D'Agostino R, Selker H. Missed diagnosis of acute myocardial infarction in the Emergency Department: Results from a multicenter study. *Annals of Emergency Medicine.* 1983;22(3):85-8.
8. Lederle FA, Parenti CM, Chute EP. Ruptured abdominal aortic aneurysm: The internist as diagnostician. *Am J Med.* 1994;96:163-7.
9. Bleeker J, Simoons M, Erdman R, al e. Patient and doctor delay in acute myocardial infarction: a study in Rotterdam. *Br J Gen Pract.* 1995;45:181-4.
10. Paauw D, Wenrich M, Curtis J, al e. Ability of primary care physicians to recognize physical findings associated with HIV infection. *JAMA.* 1995;274:1380-2.
11. Beam CA, Layde PM, Sullivan DC. Variability in the interpretation of screening mammograms by US radiologists. Findings from a national sample. *Arch Intern Med.* 1996 Jan 22;156(2):209-13.
12. Burton EC, Troxclair DA, Newman WP, III. Autopsy diagnoses of malignant neoplasms: how often are clinical diagnoses incorrect? *JAMA.* 1998;280(14):1245-8.
13. Burgess C, Ramirez A, Richards M, al e. Who and what influences delayed presentation in breast cancer? *Br J Cancer.* 1998;77:1343-8.
14. Bouma J, Broer J, Bleeker J, al e. Longer pre-hospital delay in acute myocardial infarction in women because of longer doctor decision time. *J Epidemiol Community Health.* 1999;53:459-64.
15. Meara J, Bhowmick B, Hobson P. Accuracy of diagnosis in patients with presumed Parkinson's disease. *Age Ageing.* 1999;28:99-102.
16. Goddard A, Kingston J, Hungerford J. Delay in diagnosis of retinoblastoma: risk factors and treatment outcome. *Br J Ophthalmol.* 1999;83:1320-3.

17. van Schayck C, Der Heijden F, Den Boom G, al e. Underdiagnosis of asthma: Is the doctor or the patient to blame? The DIMCA project. *Thorax*. 2000;55:562-5.
18. Pope JH, Aufderheide TP, Ruthazer R, Woolard RH, Feldman JA, Beshansky JR, et al. Missed diagnoses of acute cardiac ischemia in the emergency department. *New England Journal of Medicine*. 2000;342(16):1163-70.
19. Graff L, Russell J, Seashore J, Tate J, Elwell A, Prete M, et al. False-negative and false-positive errors in abdominal pain evaluation: failure to diagnose acute appendicitis and unnecessary surgery. *Acad Emerg Med*. 2000 Nov;7(11):1244-55.
20. von Kodolitsch Y, Schwartz AG, Nienaber CA. Clinical prediction of acute aortic dissection. *Archives of Internal Medicine*. 2000;160:2977-82.
21. Kantola S, Jokinen K, Hyrnkangas K, al e. Detection of tongue cancer in primary care. *Br J Gen Pract*. 2001;51:106-11.
22. Pidenda LA, Hathwar VS, Grand BJ. Clinical suspicion of of fatal pulmonary embolism. *Chest*. 2001;120(3):791-5.
23. Levack P, Graham J, Collie D, al e. Don't wait for a sensory level - listen to the symptoms: A prospective audit of the delays in diagnosis of malignant cord compression. *Clin Oncol (R Coll Radiol)*. 2002;14:472-80.
24. Edelman D. Outpatient diagnostic errors: unrecognized hyperglycemia. *Eff Clin Pract*. 2002 Jan-Feb;5(1):11-6.
25. Shojania K, Burton E, McDonald K, et al. The autopsy as an outcome and performance measure; Evidence report/Technology assessment #58 (Prepared by the University of California at San Francisco-Stanford Evidence-based Practice Center under Contract No.290-97-0013). AHRQ Publication No 03-E002. Rockville, MD: Agency for Healthcare Research and Quality, Rockville, MD2002 2002/10//.
26. McGinnis KS, Lessin SR, Elder DE. Pathology review of cases presenting to a multidisciplinary pigmented lesion clinic. *Arch Dermatology*. 2002;138:617-21.
27. Gorter S, van der Heijde D, van der Linden S, Houben H, Rethans JJ, Scherpbier A, et al. Psoriatic arthritis: performance of rheumatologists in daily practice. *Ann Rheum Dis*. 2002;61:219-24.
28. Lopponen M, Raiha I, Isoaho R, al e. Diagnosing cognitive impairment and dementia in primary care - a more active approach is needed. *Age Ageing*. 2003;32:606-12.
29. Goyal S, Roscoe J, Ryder W, al e. Symptom interval in young people with bone cancer. *Eur J Cancer*. 2004;40:2280-6.
30. Jiwa M, Reid J, C H, al e. Less haste more speed: factors that prolong the interval from presentation to diagnosis in some cancers. *Fam Pract*. 2004;21:299-303.
31. Vasudev N, Joffe J, Cooke C, al e. Delay in the diagnosis of testicular tumours - changes over the past 18 years. *Br J Gen Pract*. 2004;54:595-7.
32. Kowalski R, Claasen J, Kreiter K, al e. Initial misdiagnosis and outcome after subarachnoid hemorrhage. *JAMA*. 2004;291:866-9.
33. Yates J, Logan E, Stewart R. Iron deficiency anemia in general practice: clinical outcomes over three years and factors influencing diagnostic investigations. *Postgrad Med J*. 2004;80:405-10.
34. Bogun F, Anh D, Kalahasty G, Wissner E, Bou Serhal C, Bazzi R, et al. Misdiagnosis of atrial fibrillation and its clinical consequences. *Am J Med*. 2004 Nov 1;117(9):636-42.
35. Buchweitz O, Wulfig P, Malik E. Interobserver variability in the diagnosis of minimal and mild endometriosis. *Eur J Obstet Gynecol Reprod Biol*. 2005;122(2 (Oct 1)):213-7.
36. Raab SS, Grzybicki DM, Janosky JE, Zarbo RJ, Meier FA, Jensen C, et al. Clinical impact and frequency of anatomic pathology errors in cancer diagnoses. *Cancer*. 2005 Nov 15;104(10):2205-13.
37. Perlis RH. Misdiagnosis of bipolar disorder. *Am J Manag Care*. 2005;11(9 (Suppl)):S271-S4.
38. Edlow JA. Diagnosis of subarachnoid hemorrhage. *Neurocrit Care*. 2005;2(2):99-109.

39. Arnon SS, Schechter R, Maslanka SE, Jewell NP, Hatheway CL. Human botulism immune globulin for the treatment of infant botulism. *N Engl J Med*. 2006;354(5):462-72.
40. M Campos, Walsh J. Detection of alpha-1 antitrypsin deficiency in the US. *Am J Med*. 2012;125(July):623-4.
41. Schiff GD, Kim S, Abrams R, Cosby K, Elstein AS, Hasler S, et al. Diagnosing diagnosis errors: Lessons from a multi-institutional collaborative project for the diagnostic error evaluation and research project investigators. Rockville, MD: Agency for Healthcare Research and Quality; 2005; Available from: <http://www.ahrq.gov/qual/advances/>.
42. Kostopoulou O, Delaney BC, Munro CW. Diagnostic difficulty and error in primary care - a systematic review. *Family Practice*. 2008;25:400-13.
